# Supplementary material
Source: PubMed Central journal article supplement (PMC6453241)
Supplement: 746516_supplementary_material.pdf [file 746516_supplementary_material.pdf]

## Appendix

Figure A1. Structure of the health economic model

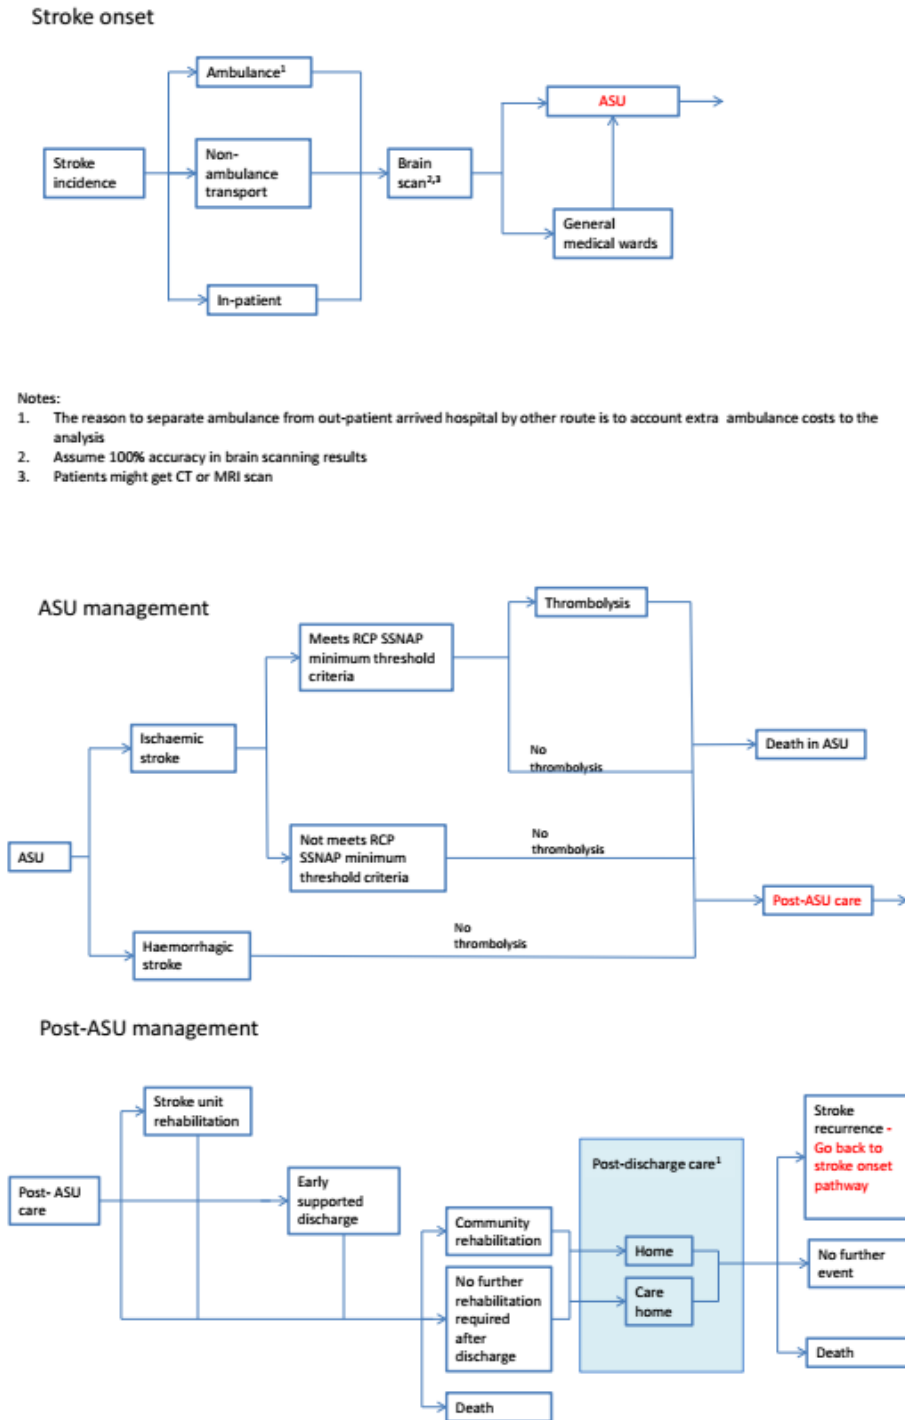

**Notes:**

1. The reason to separate ambulance from out-patient arrived hospital by other route is to account extra ambulance costs to the analysis
2. Assume 100% accuracy in brain scanning results
3. Patients might get CT or MRI scan

**Notes:**

1. Post-discharge care including GP visits and therapies provided to patients after discharged or ESD program completed. Only costs covered by NHS and local authorities will be covered in the analysis

**Table A1.** Resource use and assumptions

| Treatment unit                              | Resource use                                                                                                                                                                                                                                                                                   | Other inputs                                                            | Assumptions                                                                                                                                                                                                                                                                                                                                                                                                                                                                                                                                                        |
|---------------------------------------------|------------------------------------------------------------------------------------------------------------------------------------------------------------------------------------------------------------------------------------------------------------------------------------------------|-------------------------------------------------------------------------|--------------------------------------------------------------------------------------------------------------------------------------------------------------------------------------------------------------------------------------------------------------------------------------------------------------------------------------------------------------------------------------------------------------------------------------------------------------------------------------------------------------------------------------------------------------------|
| Acute stroke unit (ASU) and thrombolysis    | Thrombolytic therapy for those patients who were thrombolysed<br>Acute stroke unit stay                                                                                                                                                                                                        | Proportion of patient that was eligible for thrombolysis                | 100% of the patients get scanned<br>100% accuracy of scan<br>Thrombolysis treatment affects mRS and mortality in ASU. Patients were not distinguished by their thrombolysis status after they were discharged from ASU.<br>Ischaemic stroke and haemorrhage stroke treatment differs in terms of thrombolysis and length of stay.<br>An average per day cost was used. We assumed the same per day cost for patients with different levels of severity but older patients and those with more severe strokes stay in ASU for longer and therefore incur more cost. |
| General medical wards (GMW)                 | General medical ward stay                                                                                                                                                                                                                                                                      | Proportion that were admitted to GMW (rather than ASU) after brain scan | No mortality in the model.<br>No severity change in GMW<br>No thrombolysis available in GMW<br>All patients will be transferred to ASU after GMW<br>Fixed length of stay on GMW (before transfer to ASU).                                                                                                                                                                                                                                                                                                                                                          |
| Stroke unit (SU) - inpatient rehabilitation | Stroke unit stay                                                                                                                                                                                                                                                                               |                                                                         | We assumed the first team/hospital the patient was treated with provided acute care and classified as ASU when analysed the SSNAP data, and all the rest inpatient treatments were classified as SU rehabilitation (or inpatient rehabilitation)                                                                                                                                                                                                                                                                                                                   |
| Early supported discharge (ESD)             | Mean number of days of Physiotherapy, occupational therapy, speech and language therapy per Early Supported Discharge (ESD) treatment package on an average patient by age and mRS.<br>Mean number of hours of psychological therapy time per ESD treatment package by age and modified Rankin |                                                                         | Patients will have a maximum of one occupational therapy, physiotherapy and speech therapist visit per day<br>All patients in Early Supported Discharge programs are living at home<br>23% of staff cost added to cover overhead costs in sensitivity analysis                                                                                                                                                                                                                                                                                                     |

|                                     |                                                                                                                                                                                                                                                                                                                                                                                 |                                                                                             |                                                                                                                                                                                                                                                                                                                                                                         |
|-------------------------------------|---------------------------------------------------------------------------------------------------------------------------------------------------------------------------------------------------------------------------------------------------------------------------------------------------------------------------------------------------------------------------------|---------------------------------------------------------------------------------------------|-------------------------------------------------------------------------------------------------------------------------------------------------------------------------------------------------------------------------------------------------------------------------------------------------------------------------------------------------------------------------|
|                                     | Score.                                                                                                                                                                                                                                                                                                                                                                          |                                                                                             |                                                                                                                                                                                                                                                                                                                                                                         |
| Community rehabilitation team (CRT) | Community rehabilitation treatment cost episode<br>General Practitioner (GP) visits<br>Usage by age and mRS of: Care home cost (if newly admitted), Home help, Meals on wheels,<br>Social service day centre                                                                                                                                                                    | Proportion that stayed at own home/care home while doing community rehabilitation treatment | Due to the lack of data of patients' location (own home or care home) during community rehabilitation<br>Cost was from the Personal Social Services Research Unit (PSSRU) Unit Costs Of Health and Social care 2014 section 1.8                                                                                                                                         |
| Discharged to own home or care home | <u>NHS resource use</u><br>GP visits<br><u>Social care resource use</u><br>Care home – proportion of patient discharged to care home by age group and mRS at discharge<br>Home help – mean number of visits per patient by age groups and mRS<br>Meals on wheels– 3% of patients.<br>Social service day centre visits – 1.5 visits per patient per year<br>Usage by age and mRS | Proportion of patients discharged to own home or care home                                  | It was assumed that health state (mRS) does not change after the patient is discharged (unless they have a stroke recurrence)<br>People discharged to their own home or care home will stay at the same place until death or stroke recurrence<br>if patients were in a care home then they would not use the home help, meals on wheels and social day centre services |

|                   |                              |                                                                |                                                                                                                                                                                                          |
|-------------------|------------------------------|----------------------------------------------------------------|----------------------------------------------------------------------------------------------------------------------------------------------------------------------------------------------------------|
| Stroke recurrence | Same pathway as first stroke | Recurrence rate and severity from South London Stroke Register | Patient pathway is assumed to be the same for recurrent and first- stroke<br>Recurrence rate is not dependent on age or previous stroke severity<br>Maximum of 3 non-fatal stroke recurrences per person |
|-------------------|------------------------------|----------------------------------------------------------------|----------------------------------------------------------------------------------------------------------------------------------------------------------------------------------------------------------|

**Table A2 Calibration results**

| Item                                                                                                  | Odds ratio before calibration | Odds ratio after calibration | Odds ratio in Cochrane review                                                                                                                                    |
|-------------------------------------------------------------------------------------------------------|-------------------------------|------------------------------|------------------------------------------------------------------------------------------------------------------------------------------------------------------|
| Total number died in ASU                                                                              | 1.12                          | 1.76                         | 1.69(1.44,1.98)                                                                                                                                                  |
| Died in 90 days                                                                                       | 1.02                          | 1.28                         | 1.18(1.06,1.30)                                                                                                                                                  |
| mRS 2-6 in 90 days                                                                                    | 1.06                          | 0.82                         | 0.76(0.70,0.84)                                                                                                                                                  |
| mRS 3-6 in 90 days                                                                                    | 1.05                          | 0.88                         | 0.85(0.78,0.93)                                                                                                                                                  |
| mRS 3-5 in 90 days                                                                                    | 1.04                          | 0.72                         | 0.75(0.69,0.82)                                                                                                                                                  |
| Number of deaths within 1st year comparing ESD patients with non-ESD patients                         | 0.91                          | NA                           | Co-ordinated and delivered by an ESD team, all ESD patients: 0.69 [0.44,1.07]<br><br>Odds ratio in Cochrane review (all teams, all patients): 0.91[0.67, 1.25]   |
| Number of deaths or dependency (mRS 3-6) within 1st year comparing ESD patients with non-ESD patients | 0.67                          | NA                           | Co-ordinated and delivered by an ESD team, all ESD patients: 0.71 [0.55, 0.91]<br><br>Odds ratio in Cochrane review (all teams, all patients): 0.80 [0.67, 0.97] |

**Table A3** Unit costs used in the analysis

| Cost Item                 | Unit cost (£) | Data Sources                                                                            |
|---------------------------|---------------|-----------------------------------------------------------------------------------------|
| Ambulance                 | 233           | Personal Social Services Research Unit<br>A <sup>1</sup> (PSSRU 2014 7.1)               |
| MRI scan                  | 143           | National Health Service reference costs<br>(2013-2014 RA01A)                            |
| CT scan                   | 91            | National Health Service reference costs<br>(2013-2014 RA08A)                            |
| Thrombolysis              | 875           | National Health Service reference costs<br>(2013-2014 YR23A-B ;day-case)                |
| Acute stroke unit per day | 649           | National Health Service reference costs<br>(2013-2014 AA35A-F ; average cost per day of |

| Cost Item                                 | Unit cost (£) | Data Sources                                                                                                                |
|-------------------------------------------|---------------|-----------------------------------------------------------------------------------------------------------------------------|
|                                           |               | short-stay)                                                                                                                 |
| General medical ward per day              | 210           | National Audit Office, Progress in improving stroke care (2010) <sup>A2</sup> . inflated to 2015 prices                     |
| Stroke unit per day                       | 233           | National Health Service reference costs (2013-2014 AA35A-F ; average per day cost in non-elective long-stay stroke patient) |
| ESD Occupational therapy per visit        | 74            | National Health Service reference costs (2013-2014 A06A1)                                                                   |
| ESD Physiotherapy per visit               | 52            | National Health Service reference costs (2013-2014 WF01B)                                                                   |
| ESD Speech and language therapy per visit | 84            | National Health Service reference costs                                                                                     |

| Cost Item                                               | Unit cost (£) | Data Sources                                                                              |
|---------------------------------------------------------|---------------|-------------------------------------------------------------------------------------------|
|                                                         |               | (2013-2014 A13A1)                                                                         |
| ESD Psychologist per hour                               | 61            | Community therapist are collected from PSSRU 2014, 9.5                                    |
| Community rehabilitation per patient referred           | 2808          | Personal Social Services Research Unit (PSSRU 2014, 1.8)                                  |
| GP visit –23.4 minutes service + 12 minutes travel time | 103           | Personal Social Services Research Unit (PSSRU 2014, 10.8b&B.1)                            |
| Care home per day                                       | 157           | Personal Social Services Research Unit (PSSRU 2014 1.3 ; not including personal expenses) |



| Cost Item                                           | Unit cost (£) | Data Sources                                                                              |
|-----------------------------------------------------|---------------|-------------------------------------------------------------------------------------------|
| Home help – community care package per week mRS=1   | 37            | Personal Social Services Research Unit<br>(PSSRU 2014 8.1 ; older person very low cost)   |
| Home help – community care package per week mRS=2   | 148           | Personal Social Services Research Unit<br>(PSSRU 2014 8.1 ; older person low cost)        |
| Home help – community care package per week mRS=3-5 | 370           | Personal Social Services Research Unit<br>(PSSRU 2014 8.1 ;older person medium-high cost) |
| Meals on wheels per week                            | 46            | Personal Social Services Research Unit<br>(PSSRU 2014 8.1)                                |
| Social service day centre visit                     | 56            | Personal Social Services Research Unit                                                    |

| Cost Item | Unit cost (£) | Data Sources     |
|-----------|---------------|------------------|
|           |               | (PSSRU 2014 1.6) |

## **Thrombolysis Scenario Analysis**

To examine the impact of potential scenarios of improved stroke care, two alternatives were considered in our model: increased thrombolysis probabilities and increased ESD rate. For thrombolysis, two possibilities were evaluated:

- 1) 10%-100% of patients who met SSNAP minimum criteria receive thrombolysis treatment with intervals of 10%. These patients are the patients that should be thrombolysed but were not. This scenario is more realistic and conservative, the purpose is to see how much the outcomes could be improved without implementation of complicated improvement of healthcare services provided such as how patients were delivered to hospitals or further education.
- 2) 50% of patients who did not get thrombolysis due to the following reasons, now meet the criteria by age and initial severity:
  - a. Not arriving within thrombolysis time window
  - b. Wake-up time unknown
  - c. Too mild/severe
  - d. One or more of criteria above

These scenarios in section 2) were conducted to demonstrate the effect of improved healthcare service delivery. These patients might get thrombolysed with improved healthcare services. Patients who were not thrombolysed due to other reasons such as medical conditions that were not suitable for thrombolysis or patient refused thrombolysis was not considered in our model.

## Early Supported Discharge Scenario Analysis

The purpose of these analyses was to examine the effect of changing the proportion of people receiving ESD. Similar to thrombolysis, not all patients are suitable to be discharged to ESD. In practice, patients will usually be considered suitable to be discharged to ESD if they are:

- Independent or have a carer at home after stroke &...
- Not severely disabled before stroke &...
- No major language and speech problem

We did not have data on the patients' carer or whether the patient has language or speech problem, therefore the only standard we could use to examine whether a patient is suitable to be discharged to ESD is whether the patient could walk independently or not, which was assumed to be mRS 3 or less.

The following analyses were conducted:

1) Increasing the proportion of patients discharged to ESD regardless of age and severity:

- 20% of patients who were not discharged to ESD now discharged to ESD
- 35% of patients who were not discharged to ESD now discharged to ESD
- 50% of patients who were not discharged to ESD now discharged to ESD
- 80% of patients who were not discharged to ESD now discharged to ESD

2) Increase the proportion of patients discharged to ESD in less severe patients:

- 20% of mRS 0-2 patients who were not discharged to ESD now discharged to ESD
- 35% of mRS 0-2 patients who were not discharged to ESD now discharged to ESD
- 50% of mRS 0-2 patients who were not discharged to ESD now discharged to ESD
- 80% of mRS 0-2 patients who were not discharged to ESD now discharged to ESD

For both analyses, patients were switched as follows:

- ASU->CRT to ASU->ESD,
- ASU->SU to ASU->ESD, and
- ASU->SU->CRT to ASU->SU->ESD

Patients who were discharged from ASU with no rehabilitation requirement were not switched on the assumption that they did not need rehabilitation.

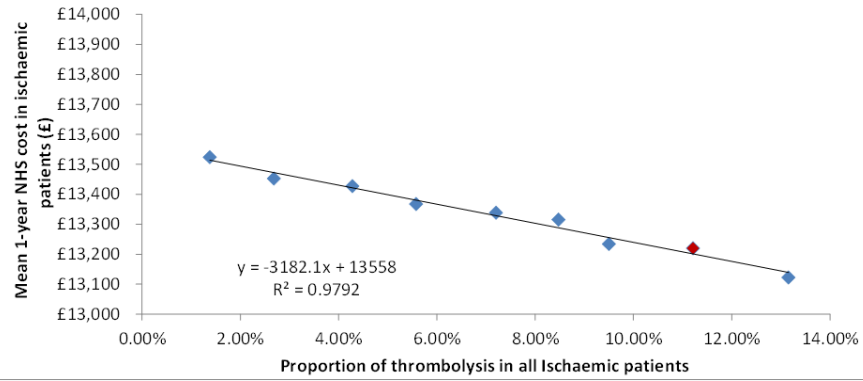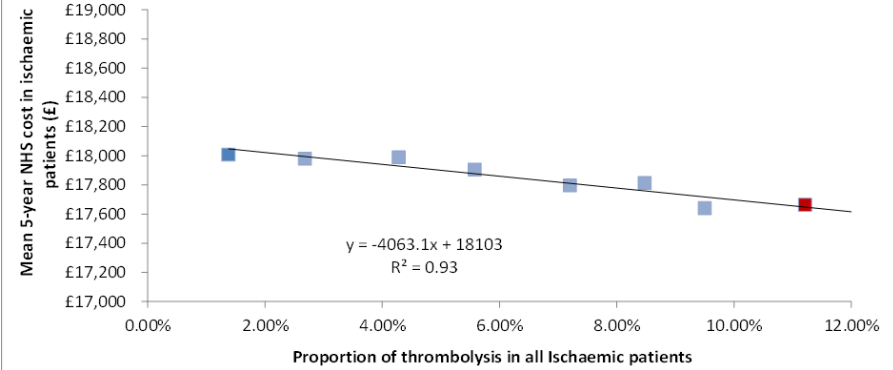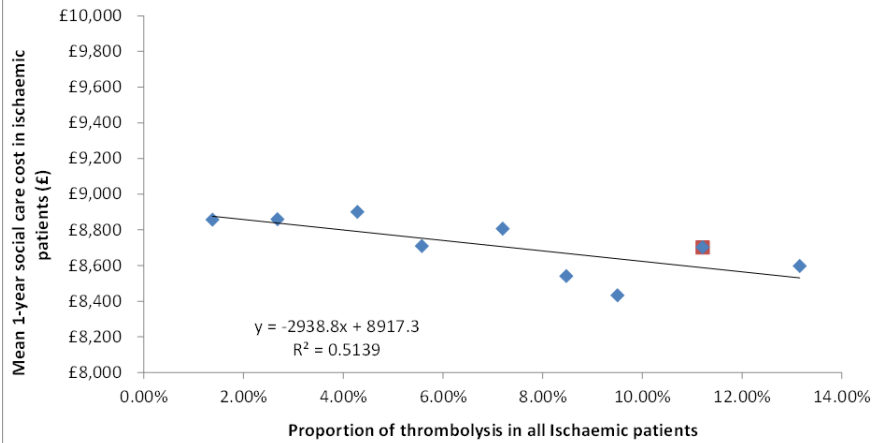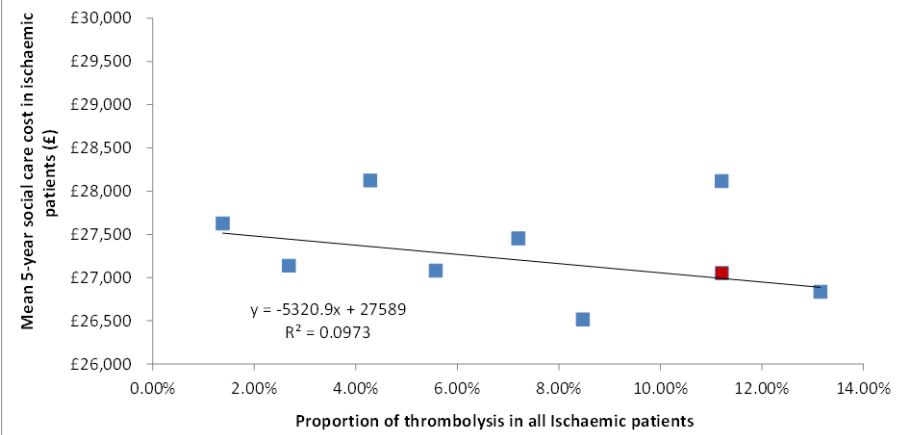

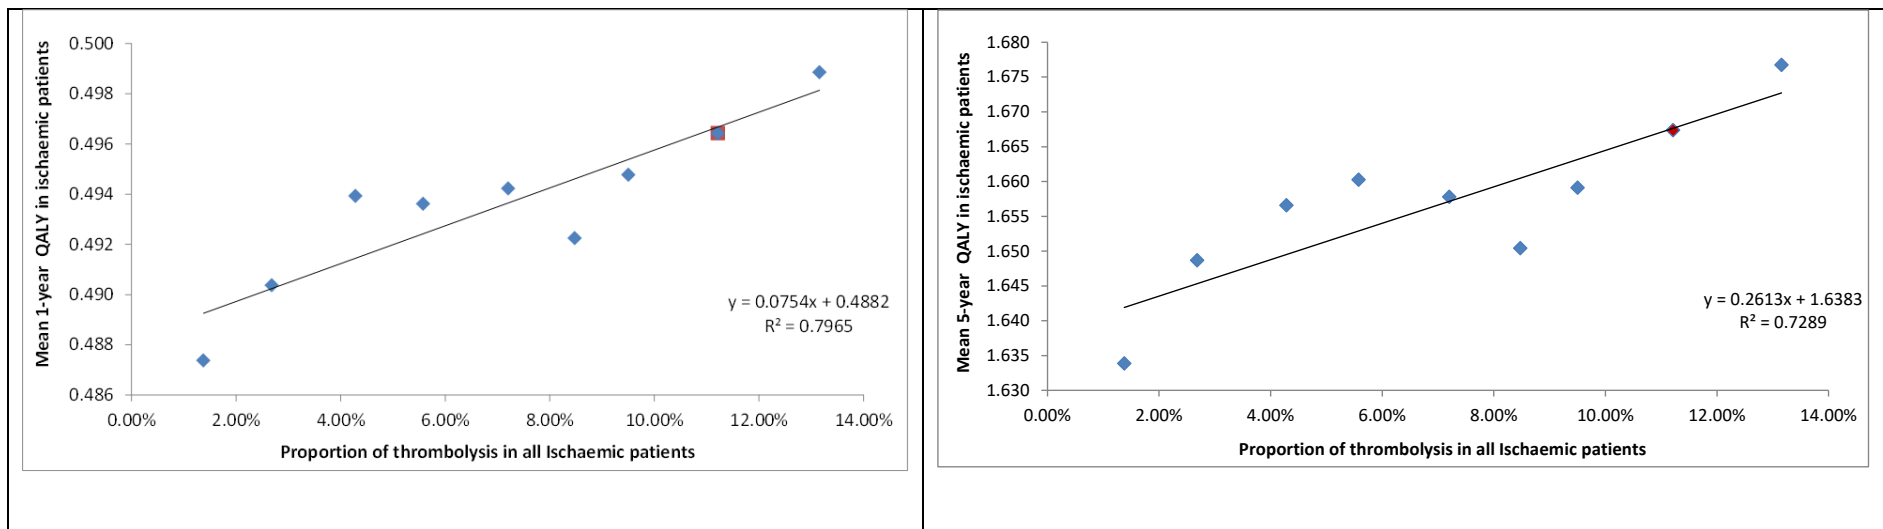

**Figure A2** Results of thrombolysis scenarios with different proportions of patients who met the SSNAP minimum criteria get thrombolysed.

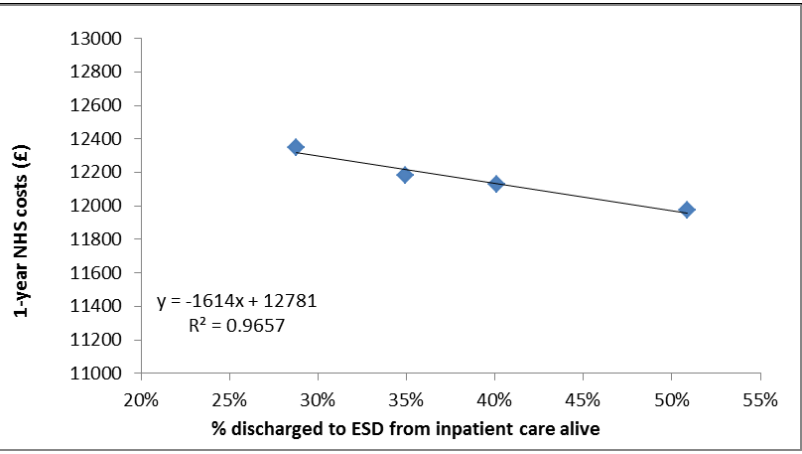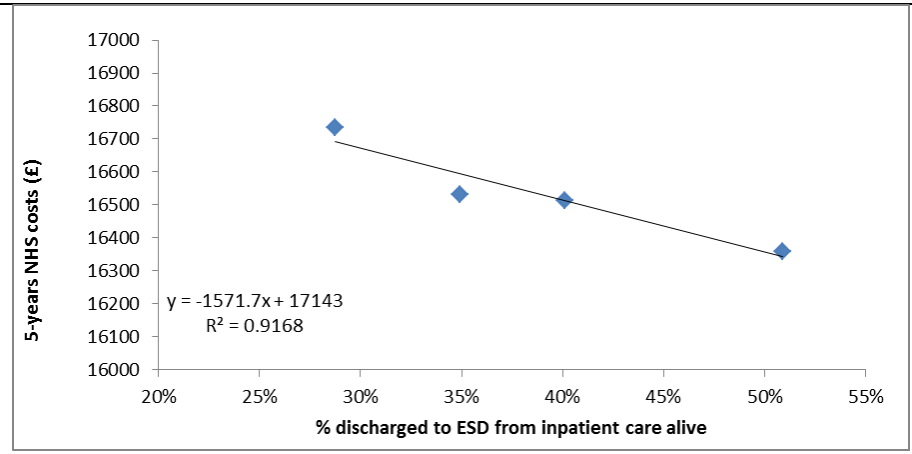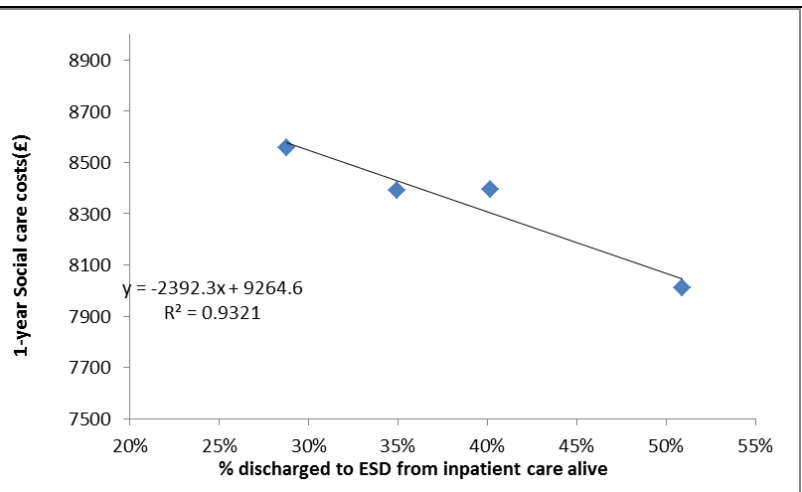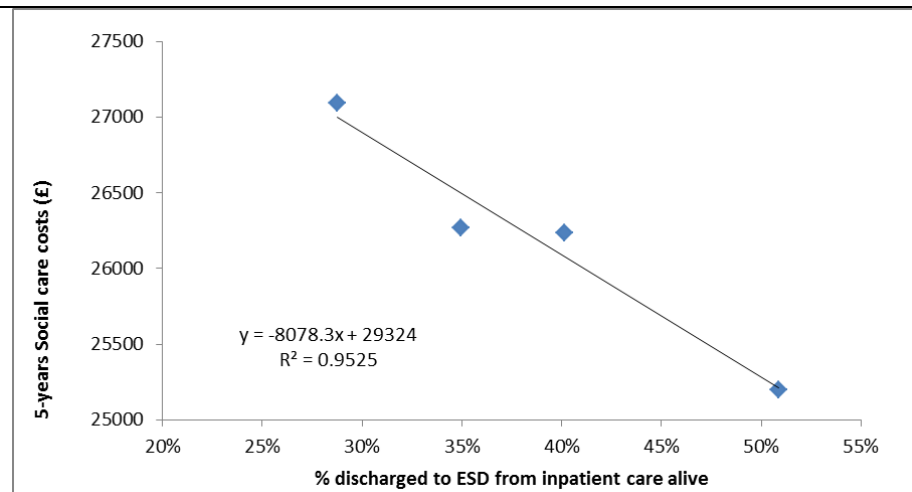



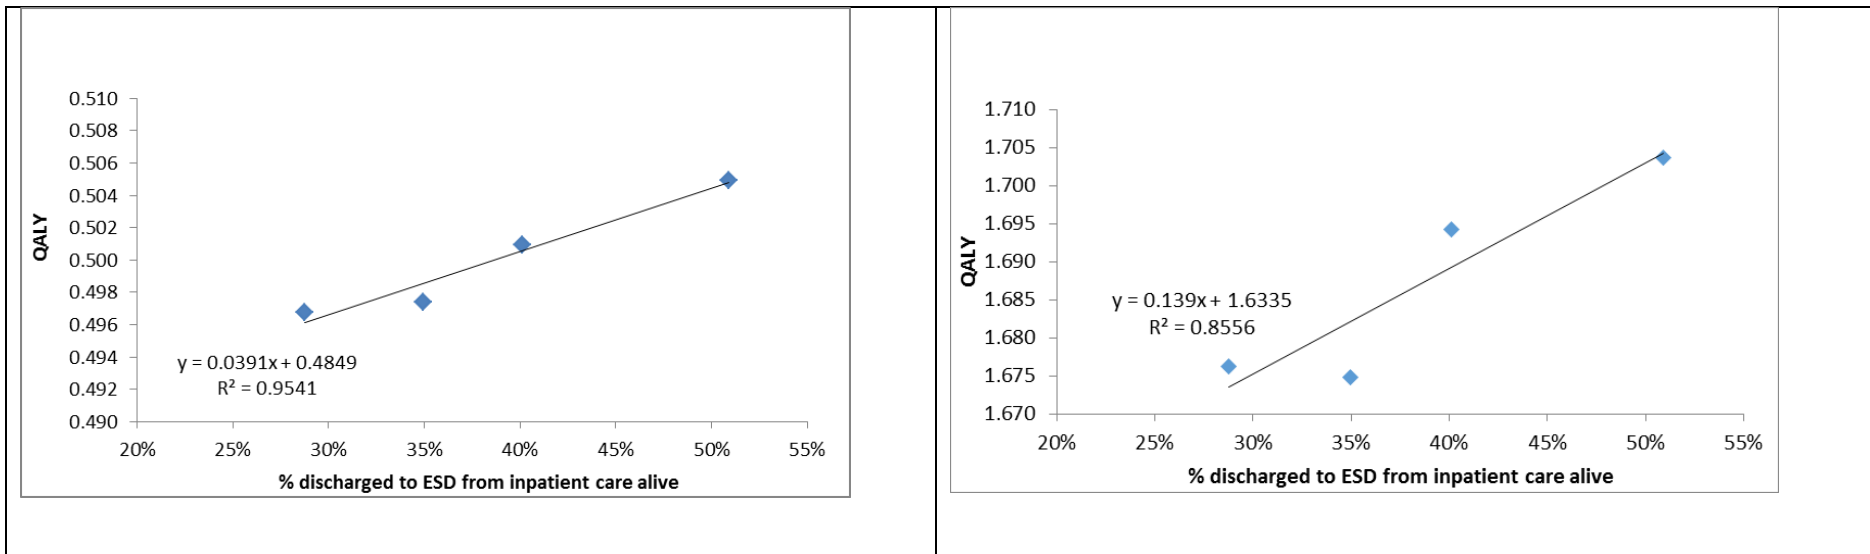

**Figure A3** Results of ESD scenarios with different proportions of patients discharged to ESD.

**Table A4.** Scenario analysis results

|           |                 | 1-year            |                      |            | 5-years           |                      |            |
|-----------|-----------------|-------------------|----------------------|------------|-------------------|----------------------|------------|
|           |                 | Mean NHS cost (£) | Mean social cost (£) | Mean QALYs | Mean NHS cost (£) | Mean social cost (£) | Mean QALYs |
| Base case | Baseline result | £13,452           | £8,977               | 0.483      | £17,963           | £28,076              | 1.627      |
|           | PSA Mean        | £13,528           | £8,992               | 0.486      | £18,009           | £28,283              | 1.636      |
|           | SEM             | £462              | £244                 | 0.007      | £538              | £871                 | 0.025      |
|           | Upper 95% CL    | £14,434           | £9,470               | 0.500      | £19,063           | £29,990              | 1.685      |
|           | Lower 95% CL    | £12,622           | £8,514               | 0.472      | £16,955           | £26,576              | 1.587      |

|                                                              |                 | 1-year            |                      |            | 5-years           |                      |            |
|--------------------------------------------------------------|-----------------|-------------------|----------------------|------------|-------------------|----------------------|------------|
|                                                              |                 | Mean NHS cost (£) | Mean social cost (£) | Mean QALYs | Mean NHS cost (£) | Mean social cost (£) | Mean QALYs |
| 95% of patients meet SSNAP minimum criteria get thrombolysed | Baseline result | £13,278           | £8,799               | 0.493      | £17,729           | £27,670              | 1.665      |
|                                                              | PSA Mean        | £13,379           | £8,948               | 0.496      | £17,918           | £28,300              | 1.661      |
|                                                              | SEM             | £491              | £348                 | 0.011      | £742              | £2,839               | 0.108      |

|                                   |                 | 1-year            |                      |            | 5-years           |                      |            |
|-----------------------------------|-----------------|-------------------|----------------------|------------|-------------------|----------------------|------------|
|                                   |                 | Mean NHS cost (£) | Mean social cost (£) | Mean QALYs | Mean NHS cost (£) | Mean social cost (£) | Mean QALYs |
|                                   | Upper 95% CL    | £14,342           | £9,631               | 0.517      | £19,371           | £33,864              | 1.872      |
|                                   | Lower 95% CL    | £12,416           | £8,265               | 0.475      | £16,464           | £22,736              | 1.450      |
| 35% of patients discharged to ESD | Baseline result | £12,783           | £8,444               | 0.498      | £17,220           | £26,429              | 1.678      |
|                                   | Mean            | £12,859           | £8,656               | 0.501      | £17,346           | £27,236              | 1.682      |
|                                   | SEM             | £479              | £367                 | 0.011      | £747              | £2,847               | 0.115      |

|  |              | 1-year            |                      |            | 5-years           |                      |            |
|--|--------------|-------------------|----------------------|------------|-------------------|----------------------|------------|
|  |              | Mean NHS cost (£) | Mean social cost (£) | Mean QALYs | Mean NHS cost (£) | Mean social cost (£) | Mean QALYs |
|  | Upper 95% CL | £13,798           | £9,375               | 0.523      | £18,810           | £32,816              | 1.907      |
|  | Lower 95% CL | £11,920           | £7,937               | 0.479      | £15,882           | £21,656              | 1.457      |

**Table A5:** Characteristics of the SSNAP cohort (01 April 2015 – 31 March 2016)

|                                        |             |
|----------------------------------------|-------------|
| n                                      | 84184       |
| Stroke type (n, %)                     |             |
| Ischaemic                              | 73318       |
| Primary intracerebral haemorrhage      | 10267       |
| Undetermined                           |             |
| Female sex (n, %)                      | 41451 (49%) |
| Pre-stroke modified Rankin score (n,%) |             |
| 0                                      | 70508 (55%) |
| 1                                      | 12683(15%)  |
| 2                                      | 8970 (11%)  |
| 3                                      | 9974 (12%)  |
| 4                                      | 5158 (6%)   |
| 5                                      | 1485 (2%)   |
| NIHSS on admission (Median, IQR)       | 5 (2-11)    |

| Level of consciousness on admission (n,%) |             |
|-------------------------------------------|-------------|
| Alert                                     | 70508 (84%) |
| Responds to voice                         | 8020 (10%)  |
| Responds to pain                          | 3375 (4%)   |
| Unconscious                               | 2281 (3%)   |

## **Additional References**

A1. Personal Social Services Research Unit. URL accessed 25<sup>th</sup> September 2017 <http://www.pssru.ac.uk/project-pages/unit-costs/>

A2. National Audit Office, Progress in improving stroke care (2010). Report on the findings from our modelling of stroke care provision. URL accessed 23rd May 2017 <https://www.nao.org.uk/report/department-of-health-progress-in-improving-stroke-care>
